# Supplementary material for: Machine Learning Algorithms Identify Pathogen-Specific Biomarkers of Clinical and Metabolomic Characteristics in Septic Patients with Bacterial Infections
Source: Biomed Res Int. 2020 Jul 27;2020:6950576. doi: 10.1155/2020/6950576 (PMC7403934; doi:10.1155/2020/6950576)
Supplement: Supplementary Materials — S2 Table A: selected features and corresponding weights associated with sepsis at hospital admission. S4 Table A: selected features and corresponding weights for effective discrimination between Gram-negative and Gram-positive bacteria at hospital admission. [file 6950576.f1.zip]

Archive with 2 entries (2 files):
- S1 Table.xlsx
- S2 Table.xlsx
