# Supplementary material for: Machine Learning Algorithms Identify Pathogen-Specific Biomarkers of Clinical and Metabolomic Characteristics in Septic Patients with Bacterial Infections
Source: Biomed Res Int. 2020 Jul 27;2020:6950576. doi: 10.1155/2020/6950576 (PMC7403934; doi:10.1155/2020/6950576)
Supplement: Supplementary Materials — S2 Table A: selected features and corresponding weights associated with sepsis at hospital admission. S4 Table A: selected features and corresponding weights for effective discrimination between Gram-negative and Gram-positive bacteria at hospital admission. [file 6950576.f1.zip › S1 Table.xlsx]

## Sheet: A
S2 Table A. Selected features and corresponding weights associated with sepsis at hospital admission.
Variance threshold	weight	MIC	weight	Relief	weight
platelet count	15169.2	temp	0.3083	platelet count	615.079
heart rate	487.697	1-arachidoyl-GPE* (20:4)	0.3083	MAP	168.304
MAP	450.907	uridine	0.3044	taurocholate	134.013
taurocholate	344.175	laurylcarnitine (C12)	0.3034	age	117.066
N-acetylneuraminate	313.989	platelet count	0.3002	apache score	54.5202
age	286.381	cortisol	0.2912	white cell_count	49.5798
white cell_count	219.489	valine	0.2853	glycocholate	39.2107
taurochenodeoxycholate	186.45	epiandrosterone sulfate	0.2851	heart rate	36.0907
serum sodium	170.504	1-stearoyl-GPC (18:0)	0.2824	N-acetylneuraminate	24.7539
mannitol	157.397	1-linoleoyl-GPC (18:2)	0.2815	serum sodium	19.7033
glycocholate	102.039	ornithine	0.2791	palmitoylcarnitine (C16)	17.876
gluconate	90.4184	glutamate	0.2781	gluconate	17.2747
glycochenodeoxycholate	81.8109	1-palmitoleoyl-GPC* (16:1)	0.2758	pyridoxate	10.8314
apache score	81.3891	isoleucine	0.2748	laurylcarnitine (C12)	10.6221
pyridoxate	72.8443	white cell_count	0.2744	lysine	9.906
respiratory rate	62.3018	2-palmitoyl-GPC* (16:0)	0.2722	mannitol	8.5174
phenylacetylglutamine	57.9761	tryptophan	0.2719	methionine	7.1322
hematocrit	53.3368	lysine	0.2711	3-(4-hydroxyphenyl)lactate (HPLA)	6.062
caprylate (8:0)	51.1681	androsterone sulfate	0.2703	ornithine	5.7718
temp	34.9855	tyrosine	0.2699	alpha-hydroxyisovalerate	5.5872
cystine	34.9511	palmitoylcarnitine (C16)	0.2695	blood lactate	5.4262
gulono-1,4-lactone	23.2547	glutamine	0.2691	glutamate	5.3563
4-acetamidobutanoate	22.5285	1-arachidoyl-GPI* (20:4)	0.2678	xylonate	4.9377
lysine	22.3482	dehydroisoandrosterone sulfate (DHEA-S)	0.2668	pyroglutamine	4.1383
3-carboxy-4-methyl-5-propyl-2-furanpropanoate (CMPF)	17.8791	1-oleoyl-GPC (18:1)	0.2636	gulono-1,4-lactone	3.7656
xylonate	17.6952	erythrose	0.2625	sucrose	3.7093
glucuronate	13.3675	phosphate	0.2616	stachydrine	3.5615
serum creatinine	12.5853	urate	0.2613	malate	3.4524
threitol	9.9272	citrulline	0.2601	pipecolate	3.2617
sucrose	9.8025	proline	0.2596	threitol	2.6799
erythronate*	9.755	laurate (12:0)	0.259	hexadecanedioate (C16)	2.4702
heme*	9.3777	hydroxyproline	0.2585	heme*	2.4112
blood lactate	8.8483	glutamylvaline	0.2582	serine	2.1081
myo-inositol	8.3069	propionylcarnitine (C3)	0.2566	androsterone sulfate	2.0276
ornithine	8.1962	1-methylimidazoleacetate	0.2556	epiandrosterone sulfate	1.9841
epiandrosterone sulfate	7.1534	myristoleate (14:1n5)	0.2555	octadecanedioate (C18)	1.765
stachydrine	7.1211	citrate	0.2553	3-indoxyl sulfate	1.7416
androsterone sulfate	6.9168	blood lactate	0.2548	dehydroisoandrosterone sulfate (DHEA-S)	1.3275
3-indoxyl sulfate	6.818	carnitine	0.2524	3-methylhistidine	1.2744
3-hydroxybutyrate (BHBA)	6.7061	allantoin	0.2522	deoxycholate	1.1878
palmitoylcarnitine (C16)	6.398	stearate (18:0)	0.2493	isobutyrylcarnitine (C4)	1.1633
1,6-anhydroglucose	5.8802	1-palmitoyl-GPC (16:0)	0.2493	1-arachidoyl-GPE* (20:4)	1.0558
xylose	5.7587	decanoylcarnitine (C10)	0.2487	1-palmitoleoyl-GPC* (16:1)	0.9324
3-(4-hydroxyphenyl)lactate (HPLA)	5.6466	docosahexaenoate (DHA; 22:6n3)	0.2483	isovalerylcarnitine (C5)	0.7768
alpha-hydroxyisovalerate	5.5619	cystine	0.2476	gamma-glutamyltyrosine	0.6926
phenol sulfate	5.1479	serine	0.2475	2-aminobutyrate	0.6242
pipecolate	5.1082	bilirubin	0.2468
maltose	4.8698	cholesterol	0.2466
taurolithocholate 3-sulfate	4.8297	glycerol	0.2454
stearidonate (18:4n3)	4.7742	methionine	0.2445
vanillylmandelate (VMA)	4.6351	3-methyl-2-oxovalerate	0.2442
arabitol	4.5731	glycine	0.2437
laurylcarnitine (C12)	4.4169	hydroxyisovaleroylcarnitine (C5)	0.2433
prolylhydroxyproline	4.3644	eicosapentaenoate (EPA; 20:5n3)	0.2428
arginine	4.3204	2-hydroxypalmitate	0.242
acetoacetate	4.2537	adenosine 5'-monophosphate (AMP)	0.2405
isobutyrylcarnitine (C4)	4.166	creatine	0.2381
N2,N2-dimethylguanosine	3.8974
scyllo-inositol	3.8929
1-methylimidazoleacetate	3.6927
creatinine	3.6375
creatine	3.5622
propionylcarnitine (C3)	3.4843
5-dodecenoate (12:1n7)	3.4834
threonate	3.406
dehydroisoandrosterone sulfate (DHEA-S)	3.2794
allantoin	3.262
oxaloacetate	3.1568
hexadecanedioate (C16)	3.1546
N6-carbamoylthreonyladenosine	3.1384
deoxycholate	3.1361
fructose	3.1325
eicosapentaenoate (EPA; 20:5n3)	3.0464
glutamate	3.0316
octanoylcarnitine (C8)	2.9691
glutaroylcarnitine (C5)	2.8994
pyroglutamine	2.6697
2-methylbutyroylcarnitine (C5)	2.6074
methionine	2.4857
N-acetylthreonine	2.4165
serine	2.4048
3-methylhistidine	2.3004
octadecanedioate (C18)	2.283
1-linoleoyl-GPC (18:2)	2.273
pantothenate (Vitamin B5)	2.2707
1-stearoyl-GPC (18:0)	2.225
bilirubin	2.1802
dihydroxyacetone	2.1196
phenylacetate	2.1044
butyrylcarnitine (C4)	2.0616
decanoylcarnitine (C10)	1.974
biliverdin	1.9108
malate	1.7197
hydroxyisovaleroylcarnitine (C5)	1.7082
Note: MIC, maximal information coefficient; MAP, mean arterial pressure; temp, temperature

## Sheet: B
S2 Table B. Prediction performances on patients with sepsis at hospital admission
	Accuracy	Sensitivity	Specificity	Positive predictive value	Negative predictive value	AUC
Variance threshold	0.84±0.049	0.97±0.040	0.38±0.147	0.85±0.035	0.68±0.255	0.94±0.038
MIC	0.88±0.044	0.99±0.019	0.53±0.165	0.88±0.039	0.85±0.198	0.94±0.054
Relief	0.80±0.038	0.95±0.042	0.30±0.216	0.83±0.049	0.37±0.248	0.93±0.044

## Sheet: C
S2 Table C. Pathway analysis of the metabolites associated with sepsis at hospital admission
	P values	Pathway Impact
Aminoacyl-tRNA biosynthesis	1.7014e-06	0.055
Nitrogen metabolism	0.00034	0
Glycine, serine and threonine metabolism	0.0068	0.21
Arginine and proline metabolism	0.0072	0.22
D-Glutamine and D-glutamate metabolism	0.013	0.35

## Sheet: D
S2 Table D. Enrichment analysis of blood disease-associated metabolites associated with sepsis at hospital admission (top 7)
	P values	Fold Enrichment
NEONATAL INTRAHEPATIC CHOLESTASIS	3.57e-05	5.83
ORNITHINE TRANSCARBAMYLASE DEFICIENCY (OTC)	0.00012	6
SCHIZOPHRENIA	0.00041	3.45
ACUTE SEIZURES	0.0012	4.29
REFRACTORY LOCALIZATION-RELATED EPILEPSY	0.0014	5
PROPIONIC ACIDEMIA	0.0046	4.99
DIFFERENT SEIZURE DISORDERS	0.006	2.9

## Sheet: E
S2 Table E. Comparison of features filtered by MIC between septic patients and controls at hospital admission
	Sepsis	Controls	P values
temp	36.82±1.08	38.02±1.67	0.000029 ***
1-arachidoyl-GPE* (20:4)	1.59±1.02	0.91±0.71	0.0022 **
uridine	1.44±0.76	1.01±0.50	0.0074 **
laurylcarnitine (C12)	2.18±3.67	0.98±1.02	0.097
platelet count	275.5±97.19	231.75±128.12	0.056
cortisol	0.79±0.27	1.23±0.81	0.000018 ***
valine	1.23±0.38	1.02±0.32	0.0081 **
epiandrosterone sulfate	1.30±2.03	2.13±2.81	0.088
1-stearoyl-GPC (18:0)	1.99±1.41	1.50±1.50	0.12
1-linoleoyl-GPC (18:2)	1.91±1.41	1.41±1.52	0.11
ornithine	2.98±4.35	1.46±2.13	0.083
glutamate	2.65±2.81	1.21±1.08	0.013 *
1-palmitoleoyl-GPC* (16:1)	1.43±1.04	0.94±1.32	0.036 *
isoleucine	1.35±0.52	1.03±0.50	0.0049 **
white cell_count	10.80±4.13	16.87±16.44	0.0012 **
2-palmitoyl-GPC* (16:0)	1.26±0.90	0.85±0.71	0.034 *
tryptophan	1.27±0.45	1.02±0.47	0.012 *
lysine	5.03±8.12	1.49±2.63	0.031 *
androsterone sulfate	0.99±1.73	2.36±2.76	0.0022 **
tyrosine	1.37±0.78	0.97±0.39	0.014 *
palmitoylcarnitine (C16)	2.21±4.69	0.98±0.90	0.18
glutamine	1.20±0.35	1.00±0.34	0.01 *
1-arachidoyl-GPI* (20:4)	1.10±0.47	1.04±0.65	0.63
dehydroisoandrosterone sulfate (DHEA-S)	0.87±1.05	1.80±1.93	0.0013 **
1-oleoyl-GPC (18:1)	1.67±0.97	1.24±1.20	0.053
erythrose	1.42±0.73	1.18±0.69	0.14
phosphate	1.23±0.37	0.99±0.33	0.003 **
urate	1.11±0.31	1.02±0.31	0.19
citrulline	1.60±0.87	0.96±0.74	0.00097 ***
proline	1.48±0.83	1.10±0.54	0.03 *
laurate (12:0)	1.07±0.37	1.15±0.60	0.4
hydroxyproline	1.55±1.34	1.17±0.80	0.16
glutamylvaline	1.10±0.46	1.17±0.76	0.57
propionylcarnitine (C3)	2.09±1.87	1.55±1.85	0.18
1-methylimidazoleacetate	0.80±0.99	1.34±2.10	0.056
myristoleate (14:1n5)	1.35±0.88	1.23±0.88	0.54
citrate	1.40±0.66	1.06±0.43	0.015 *
blood lactate	4.29±4.38	1.91±2.37	0.17
carnitine	1.06±0.32	0.96±0.39	0.16
allantoin	1.92±2.49	1.53±1.54	0.44
stearate (18:0)	1.16±0.47	1.08±0.59	0.45
1-palmitoyl-GPC (16:0)	1.80±0.88	1.16±0.92	0.0017 **
decanoylcarnitine (C10)	1.74±1.42	1.28±1.35	0.13
docosahexaenoate (DHA; 22:6n3)	1.55±0.89	1.19±0.92	0.066
cystine	2.37±3.08	1.89±6.50	0.58
serine	2.46±2.27	1.33±1.15	0.016 *
bilirubin	1.13±0.95	1.44±1.56	0.21
cholesterol	1.08±0.25	1.04±0.31	0.53
glycerol	1.42±0.91	1.02±0.47	0.033 *
methionine	1.84±2.89	1.14±0.65	0.21
3-methyl-2-oxovalerate	1.38±0.69	1.02±0.61	0.018 *
glycine	1.17±0.82	1.03±0.57	0.38
hydroxyisovaleroylcarnitine (C5)	1.28±1.12	1.20±1.32	0.76
eicosapentaenoate (EPA; 20:5n3)	1.53±1.09	1.36±1.84	0.55
2-hydroxypalmitate	1.15±0.37	1.19±0.69	0.74
adenosine 5'-monophosphate (AMP)	1.17±0.93	1.11±0.83	0.75
creatine	1.15±1.07	1.94±2.03	0.007 **
Note: *, p<0.05; **, p<0.01; ***, p<0.001
