# Supplementary material for: Machine Learning Algorithms Identify Pathogen-Specific Biomarkers of Clinical and Metabolomic Characteristics in Septic Patients with Bacterial Infections
Source: Biomed Res Int. 2020 Jul 27;2020:6950576. doi: 10.1155/2020/6950576 (PMC7403934; doi:10.1155/2020/6950576)
Supplement: Supplementary Materials — S2 Table A: selected features and corresponding weights associated with sepsis at hospital admission. S4 Table A: selected features and corresponding weights for effective discrimination between Gram-negative and Gram-positive bacteria at hospital admission. [file 6950576.f1.zip › S2 Table.xlsx]

## Sheet: A
S4 Table A. Selected features and corresponding weights for effective discrimination between Gram-negative and Gram-positive bacteria at hospital admission
Variance threshold	weight	MIC	weight	Relief	weight
platelet count	16404.1	pyroglutamine	0.3702	taurocholate	265.59
heart rate	499.218	betaine	0.3628	heart rate	189.662
taurocholate	435.469	glutaroylcarnitine (C5)	0.3557	taurochenodeoxycholate	88.3142
N-acetylneuraminate	400.687	arginine	0.3472	glycocholate	69.8659
age	302.187	alpha-tocopherol	0.3434	MAP	66.1497
MAP	301.696	3-(4-hydroxyphenyl)lactate (HPLA)	0.3418	age	42.0274
white cell_count	269.742	tiglyl carnitine (C5)	0.3388	N-acetylneuraminate	38.4259
serum sodium	214.163	N-acetylthreonine	0.3356	white cell_count	36.6527
taurochenodeoxycholate	212.162	indolelactate	0.3318	apache score	25.2103
mannitol	199.631	10-nonadecenoate (19:1n9)	0.3307	glycochenodeoxycholate	21.5573
glycocholate	124.638			hematocrit	13.315
gluconate	114.533			pipecolate	10.1224
pyridoxate	89.7409			phenylacetylglutamine	7.7782
apache score	79.4959			1-linoleoyl-GPC (18:2)	3.3303
phenylacetylglutamine	70.4788			stachydrine	3.1472
respiratory rate	68.72			eicosapentaenoate (EPA; 20:5n3)	2.4311
glycochenodeoxycholate	66.3271			alpha-hydroxyisovalerate	2.4237
caprylate (8:0)	65.6502
hematocrit	56.7043
cystine	42.2472
temp	31.0604
4-acetamidobutanoate	26.7228
gulono-1,4-lactone	24.3319
3-carboxy-4-methyl-5-propyl-2-furanpropanoate (CMPF)	21.7109
xylonate	20.4219
glucuronate	13.9392
serum creatinine	12.2753
threitol	11.2742
sucrose	11.0646
erythronate*	10.7724
myo-inositol	8.556
3-indoxyl sulfate	8.0687
epiandrosterone sulfate	7.8832
androsterone sulfate	7.633
heme*	7.57
lysine	6.8893
stachydrine	6.7243
3-hydroxybutyrate (BHBA)	6.4883
maltose	5.9091
stearidonate (18:4n3)	5.8698
blood lactate	5.8534
taurolithocholate 3-sulfate	5.7821
1,6-anhydroglucose	5.7449
arginine	5.485
alpha-hydroxyisovalerate	5.1106
phenol sulfate	5.0602
acetoacetate	5.0029
arabitol	4.9201
vanillylmandelate (VMA)	4.7524
ornithine	4.5529
pipecolate	4.4621
1-methylimidazoleacetate	4.4045
creatine	4.1161
prolylhydroxyproline	4.1118
N2,N2-dimethylguanosine	4.0291
threonate	3.9275
creatinine	3.8902
isobutyrylcarnitine (C4)	3.7986
dehydroisoandrosterone sulfate (DHEA-S)	3.7165
oxaloacetate	3.6765
5-dodecenoate (12:1n7)	3.6661
eicosapentaenoate (EPA; 20:5n3)	3.614
xylose	3.4828
N6-carbamoylthreonyladenosine	3.4175
propionylcarnitine (C3)	3.4024
fructose	3.327
octanoylcarnitine (C8)	3.181
hexadecanedioate (C16)	3.0577
scyllo-inositol	2.9687
N-acetylthreonine	2.9401
pantothenate (Vitamin B5)	2.9383
3-(4-hydroxyphenyl)lactate (HPLA)	2.9011
2-methylbutyroylcarnitine (C5)	2.6338
bilirubin	2.5623
deoxycholate	2.5056
allantoin	2.4865
glutaroylcarnitine (C5)	2.4801
butyrylcarnitine (C4)	2.3877
octadecanedioate (C18)	2.3733
1-linoleoyl-GPC (18:2)	2.2977
1-stearoyl-GPC (18:0)	2.2383
biliverdin	2.1724
dihydroxyacetone	2.1611
pyroglutamine	2.1381
3-methylhistidine	2.103
caprate (10:0)	1.9833
hexanoylcarnitine (C6)	1.9738
decanoylcarnitine (C10)	1.9557
Note: MIC, maximal information coefficient; MAP, mean arterial pressure

## Sheet: B
S4 Table B. Prediction performances on septic patients infected by Gram-negative and Gram-positive bacteria at hospital admission
	Accuracy	Sensitivity	Specificity	Positive predictive value	Negative predictive value	AUC
Variance threshold	0.62±0.064	0.80±0.085	0.23±0.138	0.69±0.046	0.33±0.202	0.70±0.110
MIC	0.74±0.046	0.86±0.063	0.48±0.171	0.79±0.057	0.59±0.167	0.80±0.085
Relief	0.70±0.077	0.85±0.073	0.37±0.179	0.74±0.057	0.44±0.226	0.71±0.109

## Sheet: C
S4 Table C. Pathway analysis of the metabolites for effective discrimination between Gram-negative and Gram-positive bacteria at hospital admission
	P values	Pathway Impact
Ubiquinone and other terpenoid-quinone biosynthesis	0.0021	0.037
D-Arginine and D-ornithine metabolism	0.017	0

## Sheet: D
S4 Table D. Enrichment analysis of blood disease-associated metabolites for effective discrimination between Gram-negative and Gram-positive bacteria at hospital admission (top 7)
	P values	Fold Enrichment
CHRONIC RENAL FAILURE	0.0096	12.27
SHORT-BOWEL SYNDROME (PERMANENT INTESTINAL FAILURE)	0.025	39.84
CYSTIC FIBROSIS (CF)	0.049	19.96
HYPERARGININEMIA	0.049	19.96
SHORT BOWEL SYNDROME (UNDER ARGININE-FREE DIET)	0.049	19.96
ABETALIPOPROTEINEMIA, BASSEN-KORNZWEIG-SYNDROME, ACANTHOCYTOSIS (ABL)	0.061	15.97
ARGININEMIA. HYPERARGININEMIA, ARGINASE DEFICIENCY	0.061	15.97
